# Supplementary material for: A novel multichromic Zn(ii) cationic coordination polymer based on a new flexible viologen ligand exhibiting aniline detection in the solid state
Source: Royal Society of Chemistry journal article supplement (doi:10.1039/d1dt01685g), 2021-01-01
Supplement: d1dt01685g1.pdf [file d1dt01685g1.pdf]

## **A novel multichromic Zn ( II ) cationic coordination polymer based on a new flexible viologen ligand exhibiting aniline detection in solid state**

Jia yun Zou, Jie Ji, Mei hong Fan, Jia yu Li, Hai yu Wang and Guo-Dong Li \*

### **Computational methods and models**

All of the DFT calculations were performed by using Vienna ab initio simulation package (VASP).<sup>1, 2</sup> The exchange–correlation energy is treated based on the generalized gradient approximation (GGA) in the scheme of Perdew–Burke–Ernzerhof (PBE).<sup>3</sup> The core–electron interactions are describe by Projector–augmented–wave (PAW) pseudopotentials.<sup>4</sup> The Grimme’s dispersion correction (DFT–D3) method is applied to describe the van der Waals (vdW) interaction.<sup>5</sup> A  $5 \times 3 \times 2$  Monkhorst–Pack k–point grid was adopted for calculations on Complex **1**. The energy cutoff is set to be 420 eV. All atoms were fully relaxed until the total energy converges to less than  $10^{-4}$  eV and the ionic relaxation were performed until the force on each atom converge to within  $0.02 \text{ eV } \text{Å}^{-1}$ .

### References

- 1 G. Kresse and J. Furthmuller, *Phys. Rev. B: Condens. Matter Mater. Phys.*, 1996, 54, 11169.
- 2 G. Kresse and J. Furthmuller, *Comput. Mater. Sci.*, 1996, 6, 15–50.
- 3 J. P. Perdew, K. Burke and M. Ernzerhof, *Phys. Rev. Lett.*, 1996, 77, 3865.

4 P. E. Blöchl, Phys. Rev. B, 1994, 50, 17953–17979.

5 S. Grimme, J. Antony, S. Ehrlich and H. Krieg, J. Chem. Phys., 2010, 132, 154104–154123

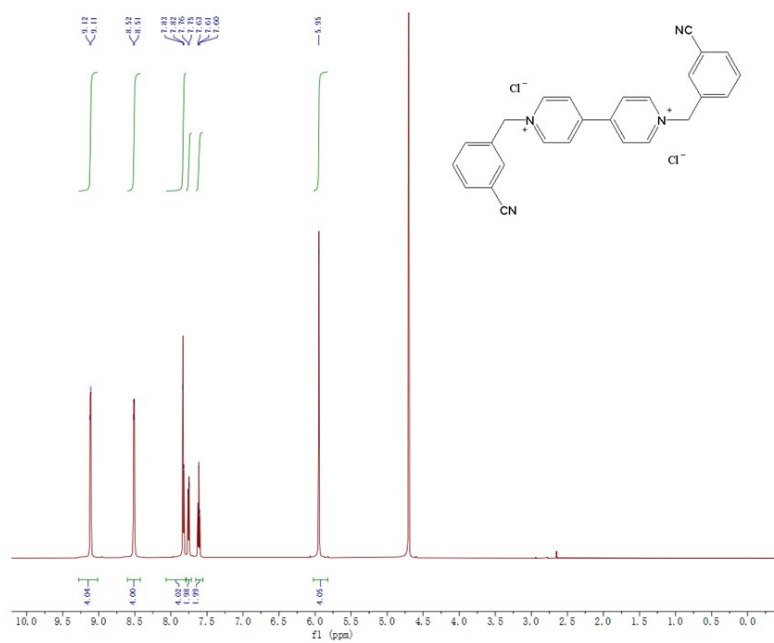

Fig. S1 The  $^1\text{H}$  NMR spectrum of viologen ligand in  $\text{D}_2\text{O}$  (600 MHz).

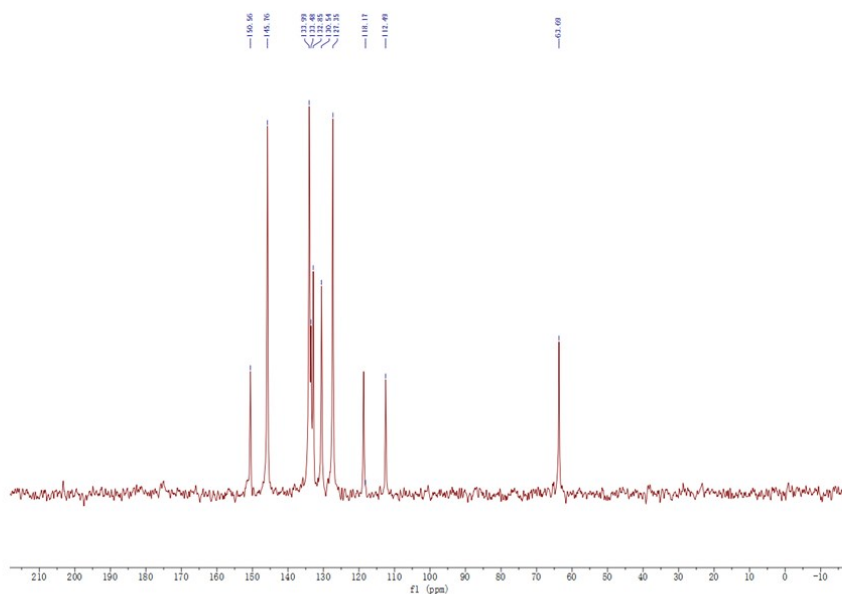

Fig. S2 The  $^{13}\text{C}$ -NMR spectrum of viologen ligand in  $\text{D}_2\text{O}$  (600 MHz).

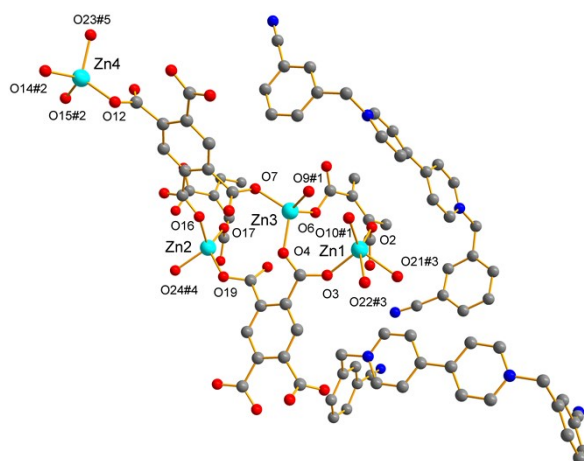

Fig. S3 The asymmetric unit of complex 1 ( all H atoms were omitted for clarity)

**Symmetry codes:** for complex: #1: 1-x, -y, 1-z; #2: 2-x, -y, 1-z; #3: 1-x, 1-y, 2-z; #4: 2-x, 1-y, 2-z; #5: x, -1+y, -1+z .

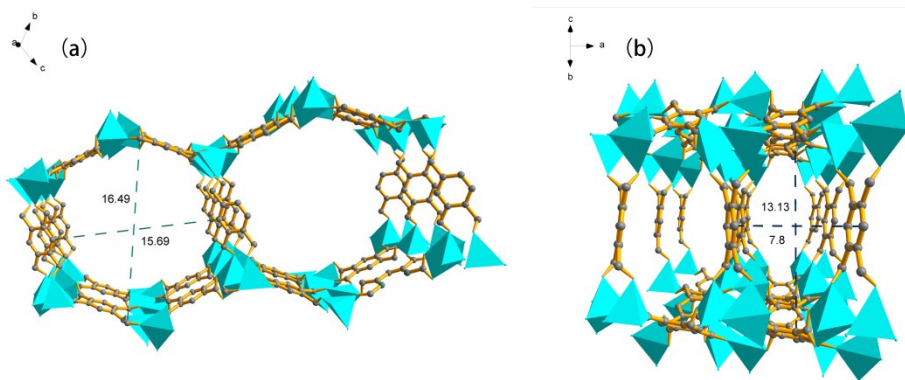

Fig. S4 Three-dimensional channels in the crystal.

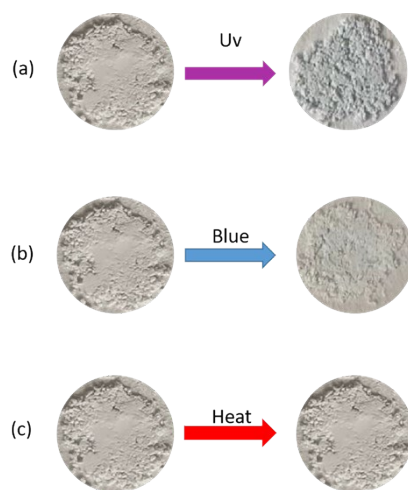

Fig. S5 Discoloration of viologen ligand (a)Uv irradiation (b)Blue ray irradiation (c)heat at 120°C

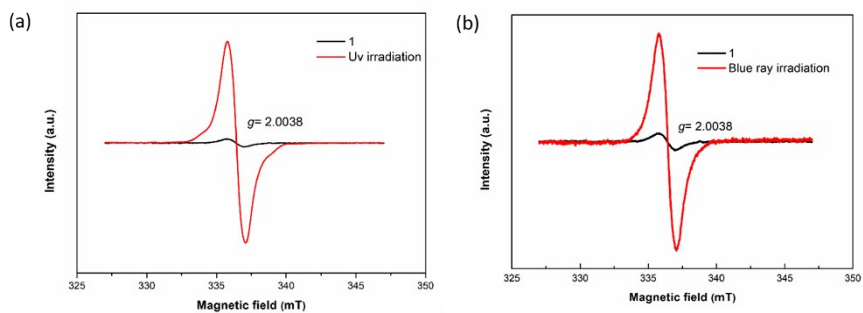

Fig. S6 EPR data of complex **1** before and after (a)Uv irradiation (b)Blue rays irradiation.

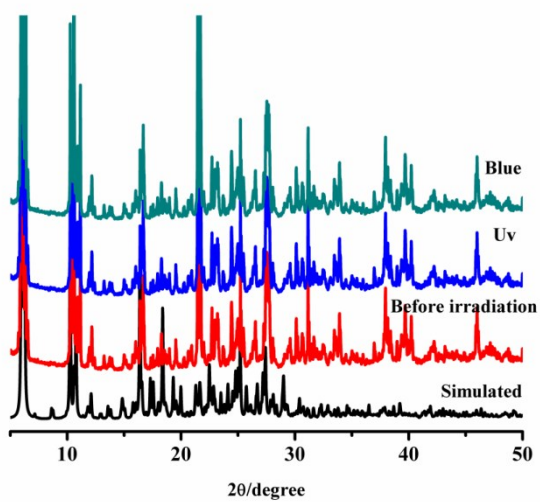

Fig. S7 PXRD patterns of **1** before irradiation, after irradiated by UV and blue rays, respectively. The black line is the simulated curve.

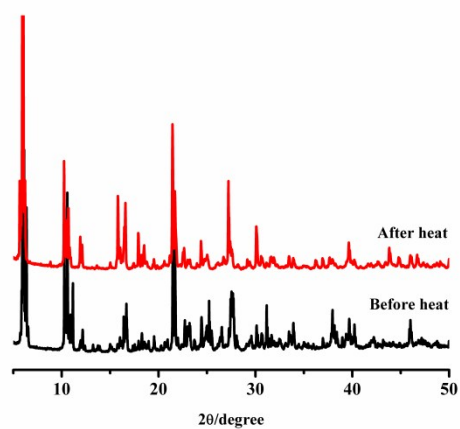

Fig. S8 PXRD patterns of **1** before and after heated at 120 °C.

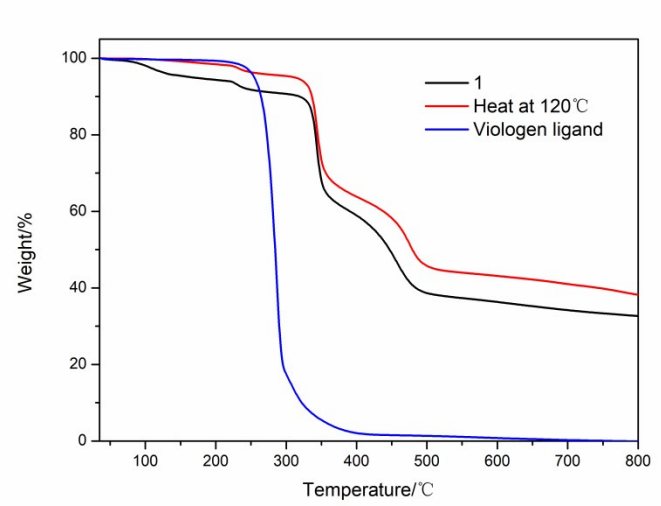

Fig. S9 The TGA date of **1**, heat at 120 °C and the viologen ligand.

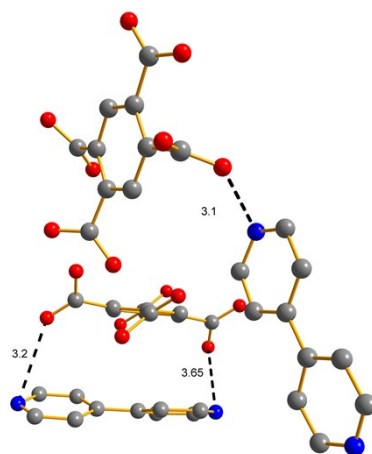

Fig. S10 The electron transfer pathways of **1** studied by VASP.

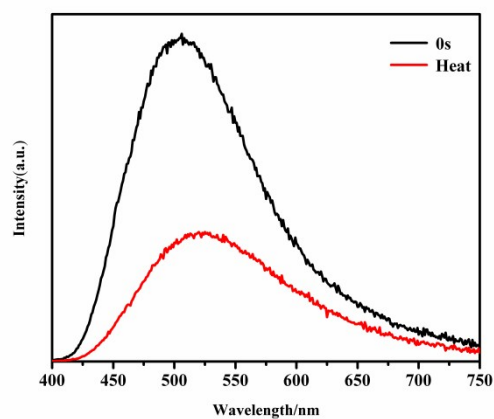

Fig. S11 The luminescence spectra of **1** before and after heated at 120 °C.

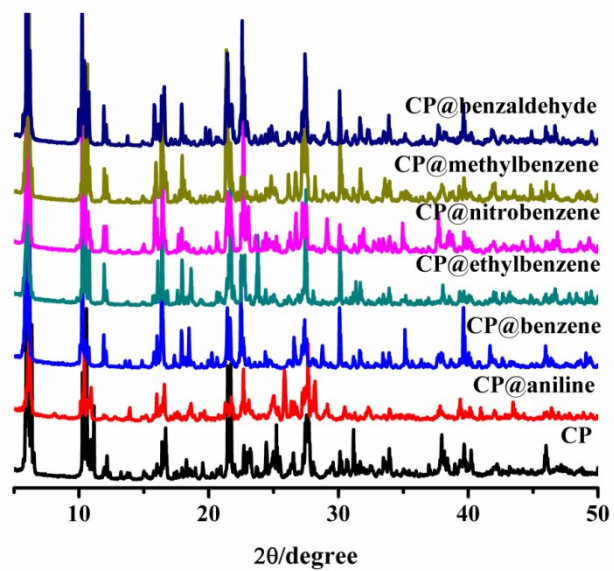

Fig. S12 PXRD patterns of **1** and after detecting different benzenes.

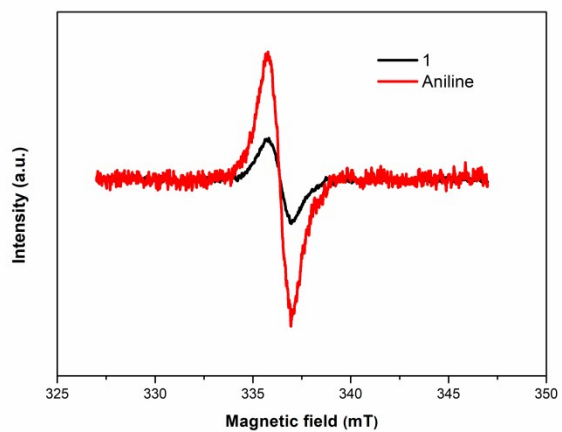

Fig. S13 EPR of complex **1** and after detecting aniline.

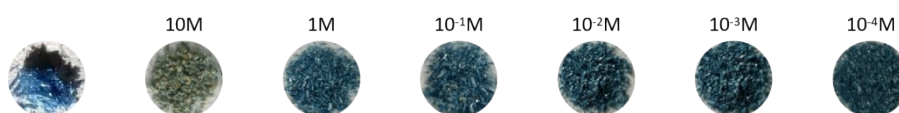

Fig. S14 Varied colour changing to detect  $\text{NO}_2^-$  from  $\text{NaNO}_2$  solution with different concentration.

Table S1 Crystal data and structure refinement for **1**.

|                   |                                                                |
|-------------------|----------------------------------------------------------------|
| Empirical formula | $\text{C}_{82}\text{H}_{56}\text{N}_8\text{O}_{29}\text{Zn}_4$ |
| Formula weight    | 1878.82                                                        |



---

|                                         |                                                                |
|-----------------------------------------|----------------------------------------------------------------|
| Crystal system                          | triclinic                                                      |
| Space group                             | P-1                                                            |
| a/Å                                     | 15.5845(8)                                                     |
| b/Å                                     | 16.7477(9)                                                     |
| c/Å                                     | 16.9751(9)                                                     |
| $\alpha$ /°                             | 114.048(2)                                                     |
| $\beta$ /°                              | 100.299(2)                                                     |
| $\gamma$ /°                             | 101.237(2)                                                     |
| Volume/Å <sup>3</sup>                   | 3800.0(4)                                                      |
| Z                                       | 2                                                              |
| Temperature/K                           | 297                                                            |
| $\rho_{\text{calc}}/\text{cm}^3$        | 1.642                                                          |
| $\mu/\text{mm}^{-1}$                    | 2.251                                                          |
| Radiation                               | CuK $\alpha$ ( $\lambda$ = 1.54178)                            |
| 2 $\Theta$ range for data collection/°  | 5.954 to 101.202                                               |
| Reflections collected                   | 57367                                                          |
| Independent reflections                 | 8001 [ $R_{\text{int}}$ = 0.1264, $R_{\text{sigma}}$ = 0.0796] |
| Goodness-of-fit on $F^2$                | 1.034                                                          |
| Final R indexes [ $I \geq 2\sigma(I)$ ] | $R_1$ = 0.0616, $wR_2$ = 0.1553                                |
| Final R indexes [all data]              | $R_1$ = 0.0962, $wR_2$ = 0.1775                                |

---

Table S2 The main crystal data of **1**, **1-UV** and **1-blue**.

|             | <b>1</b>   | <b>1-UV</b> | <b>1-blue</b> |
|-------------|------------|-------------|---------------|
| a           | 15.5845(8) | 15.5797(7)  | 15.5861(8)    |
| b           | 16.7477(9) | 16.7473(8)  | 16.7515(8)    |
| c           | 16.9751(9) | 16.9714(8)  | 16.9797(8)    |
| $\alpha$    | 114.048(2) | 114.109(2)  | 114.137(1)    |
| $\beta$     | 100.299(2) | 100.262(2)  | 100.258(2)    |
| $\gamma$    | 101.237(2) | 101.279(2)  | 101.247(2)    |
| Volume      | 3800.0(4)  | 3795.6(3)   | 3799.7(3)     |
| Space group | P -1       | P-1         | P-1           |
